# Supplementary material
Source: Royal Society of Chemistry journal article supplement (doi:10.1039/d6tb00719h)
Supplement: d6tb00719h1.pdf [file d6tb00719h1.pdf]

## Supporting Information

PCL-b-PLLA diblock copolymers with high performance to replace polyoxymethylene for tissue ligation clips

Quan Zhao<sup>a</sup>, Ziyun He<sup>a</sup>, Lei Tang<sup>a</sup>, Yang Pan<sup>a</sup>, Shuhua Chang<sup>a</sup>, Nan Zhang<sup>b\*</sup>, Bin He<sup>a\*</sup>

<sup>a</sup> National Engineering Research Center for Biomaterials, College of Biomedical Engineering, Sichuan University, Chengdu 610064, China

<sup>b</sup> Institute of Organoid on Chip and Drug Translation Research, Henan Academy of Sciences, Zhengzhou 450046, China

\* Corresponding authors: bhe@scu.edu.cn (Bin He); znan@hnas.ac.cn (Nan Zhang)

**Table S1.** The characterizations of P(CL-r-LLA) and PCL-b-PLLA copolymers.

| Samples | Copolymer Type | CL:LLA (mol:mol) |                       | $M_n$ (Da) <sup>b)</sup> | $\bar{D}$ <sup>b)</sup> | $[\eta]$ (dL·g <sup>-1</sup> ) <sup>c)</sup> |
|---------|----------------|------------------|-----------------------|--------------------------|-------------------------|----------------------------------------------|
|         |                | Feed             | Product <sup>a)</sup> |                          |                         |                                              |
| RP10    | P(CL-r-LLA)    | 10:90            | 10:90                 | 36840                    | 2.45                    | 1.96                                         |
| RP15    | P(CL-r-LLA)    | 15:85            | 13:87                 | 35611                    | 1.99                    | 1.75                                         |
| RP20    | P(CL-r-LLA)    | 20:80            | 22:78                 | 36979                    | 2.20                    | 1.87                                         |
| BP10    | PCL-b-PLLA     | 10:90            | 11:89                 | 37007                    | 2.88                    | 2.94                                         |
| BP15    | PCL-b-PLLA     | 15:85            | 15:85                 | 38873                    | 2.03                    | 2.55                                         |
| BP20    | PCL-b-PLLA     | 20:80            | 20:80                 | 29195                    | 2.59                    | 2.37                                         |

<sup>a)</sup> Determined by <sup>1</sup>H-NMR using CDCl<sub>3</sub> as solvent; <sup>b)</sup> Determined by GPC using THF as eluent;  $M_n$  values are apparent molecular weights; <sup>c)</sup> Determined by Ubbelohde viscometry using CHCl<sub>3</sub> as solvent.

**Table S2.** Thermal properties of P(CL-r-LLA) and PCL-b-PLLA copolymers.

| Samples | T <sub>g</sub><br>(°C) | T <sub>cc</sub><br>(°C) | ΔH <sub>cc</sub><br>(J·g <sup>-1</sup> ) | T <sub>m</sub><br>(°C) | ΔH <sub>m</sub><br>(J·g <sup>-1</sup> ) | T <sub>5%loss</sub><br>(°C) | T <sub>95%loss</sub><br>(°C) |
|---------|------------------------|-------------------------|------------------------------------------|------------------------|-----------------------------------------|-----------------------------|------------------------------|
| RP10    | 53.2                   | -                       | -                                        | 150.1                  | 0.9                                     | 282.8                       | 348.2                        |
| RP15    | 49.3                   | -                       | -                                        | 146.8                  | 0.4                                     | 304.5                       | 388.3                        |
| RP20    | 32.6                   | -                       | -                                        | -                      | -                                       | 284.1                       | 391.0                        |
| BP10    | 59.7                   | 130.2                   | 25.4                                     | 52.5, 167.4            | 1.8, 24.5                               | 280.2                       | 335.0                        |
| BP15    | 61.4                   | 110.7                   | 29.1                                     | 55.1, 177.5            | 3.0, 32.5                               | 294.3                       | 398.7                        |
| BP20    | 59.7                   | 101.5                   | 31.6                                     | 54.3, 166.9            | 4.7, 30.8                               | 297.5                       | 385.5                        |

**Table S3.** Mechanical properties of P(CL-r-LLA) and PCL-b-PLLA copolymers.

| Samples | Yield Strength<br>(MPa) | Young's<br>Modulus (MPa) | Breaking<br>Strength (MPa) | Breaking<br>Elongation (%) |
|---------|-------------------------|--------------------------|----------------------------|----------------------------|
| RP10    | 31.0±1.8                | 1058±142                 | 37.0±1.2                   | 179±13                     |
| RP15    | 21.6±1.0                | 662±57                   | 32.0±2.6                   | 230±20                     |
| RP20    | 15.3±0.6                | 377±34                   | 31.4±1.4                   | 256±10                     |
| BP10    | 49.6±1.6                | 1959±62                  | 37.4±2.3                   | 70±16                      |
| BP15    | 39.0±1.4                | 1424±96                  | 38.7±1.4                   | 142±7                      |
| BP20    | 29.8±1.0                | 1244±88                  | 27.3±1.7                   | 168±16                     |

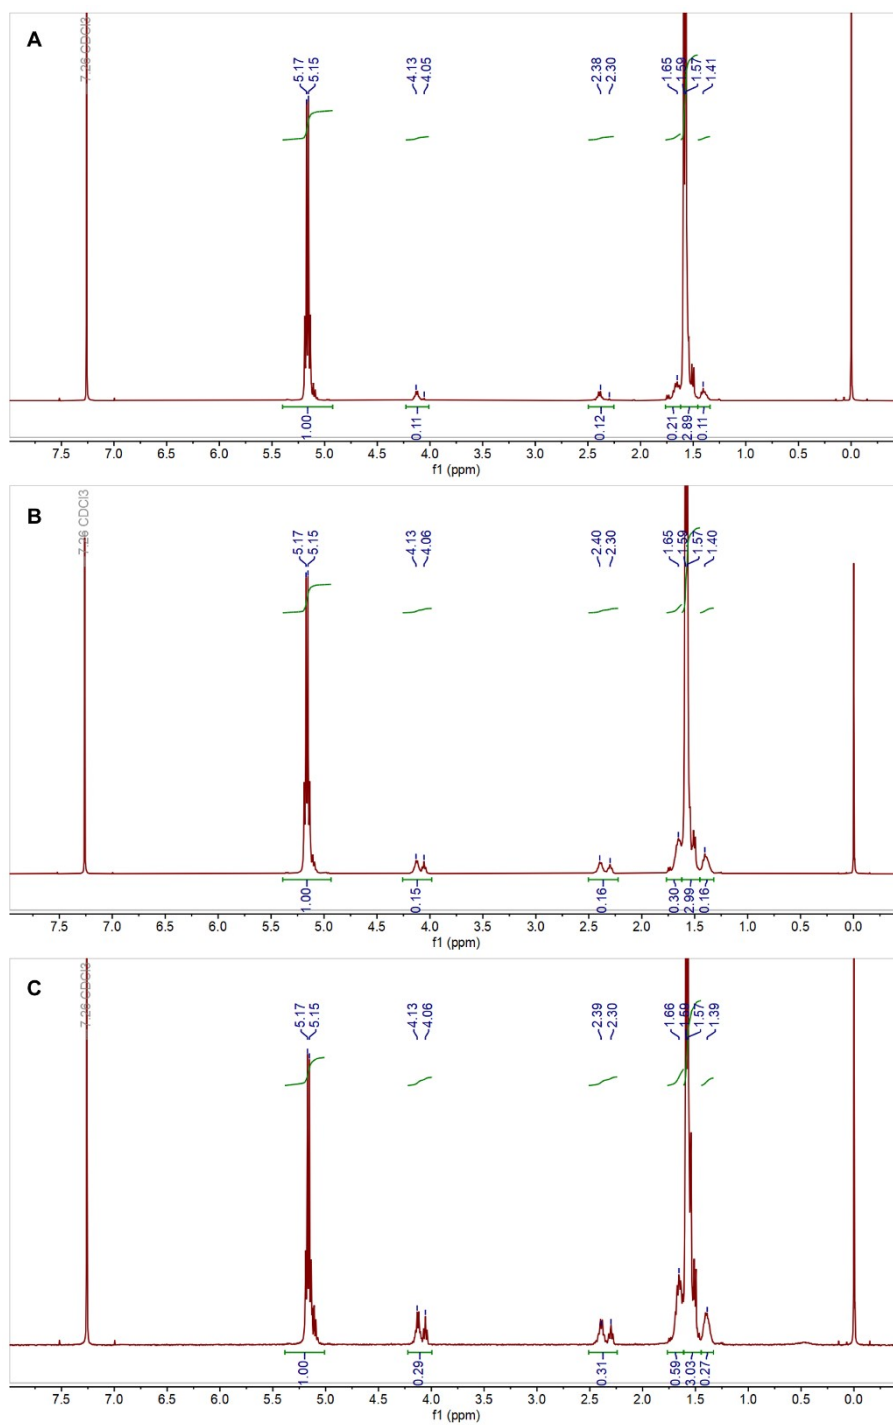

Fig. S1 <sup>1</sup>H NMR spectra of P(CL-r-LLA) copolymers (with peak assignments and integrations). (A) RP10. (B) RP15. (C) RP20.

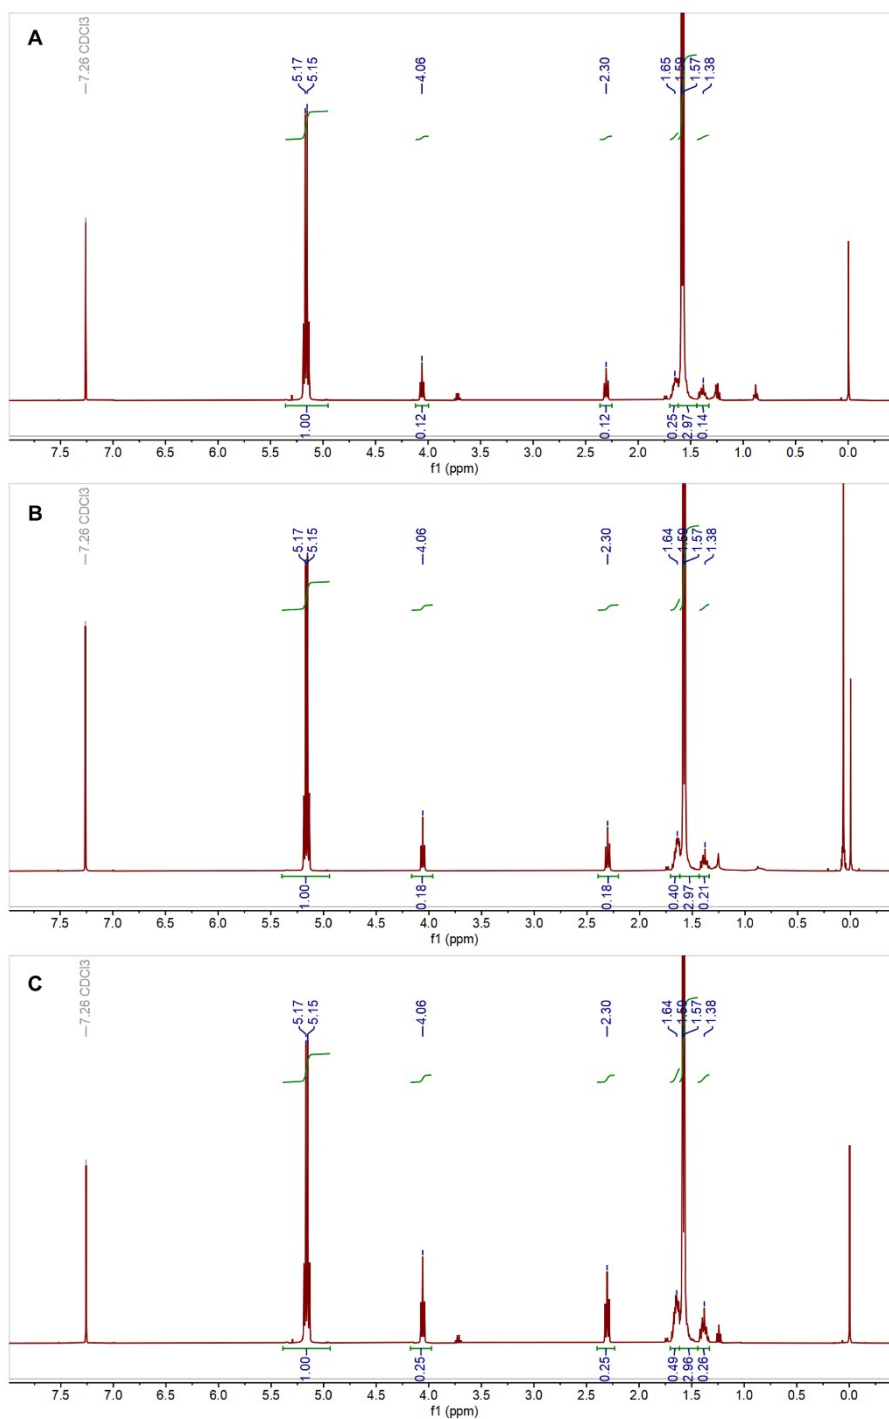

Fig. S2  $^1\text{H}$  NMR spectra of PCL-b-LLA copolymers (with peak assignments and integrations). (A) BP10. (B) BP15. (C) BP20.

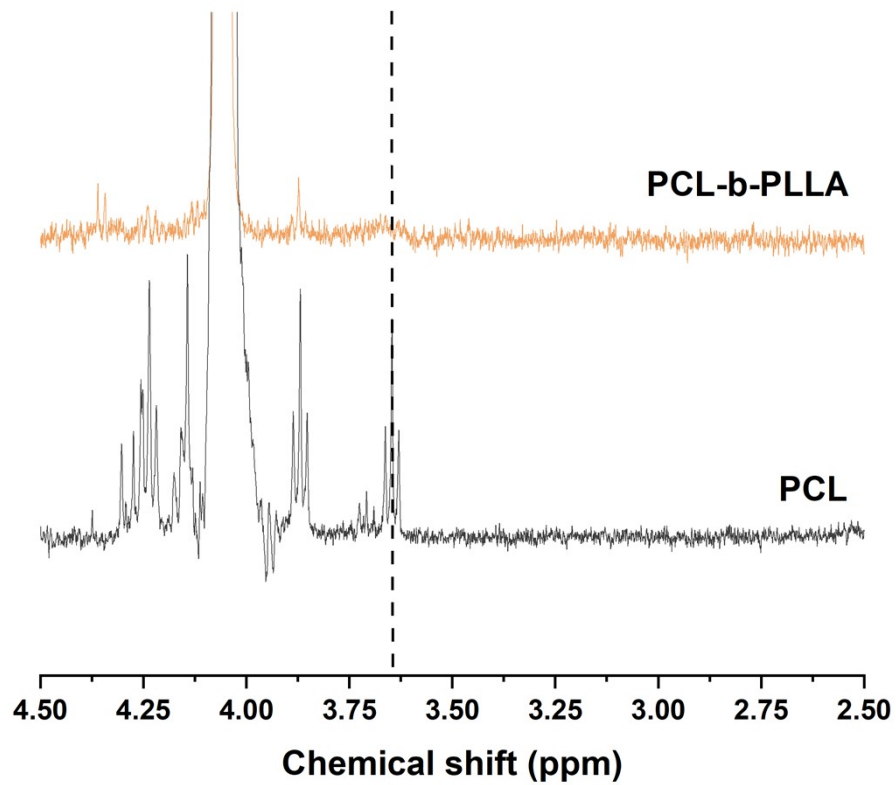

Fig. S3 Enlarged views of characteristic regions in the <sup>1</sup>H NMR spectra of PCL and PCL-b-PLLA.

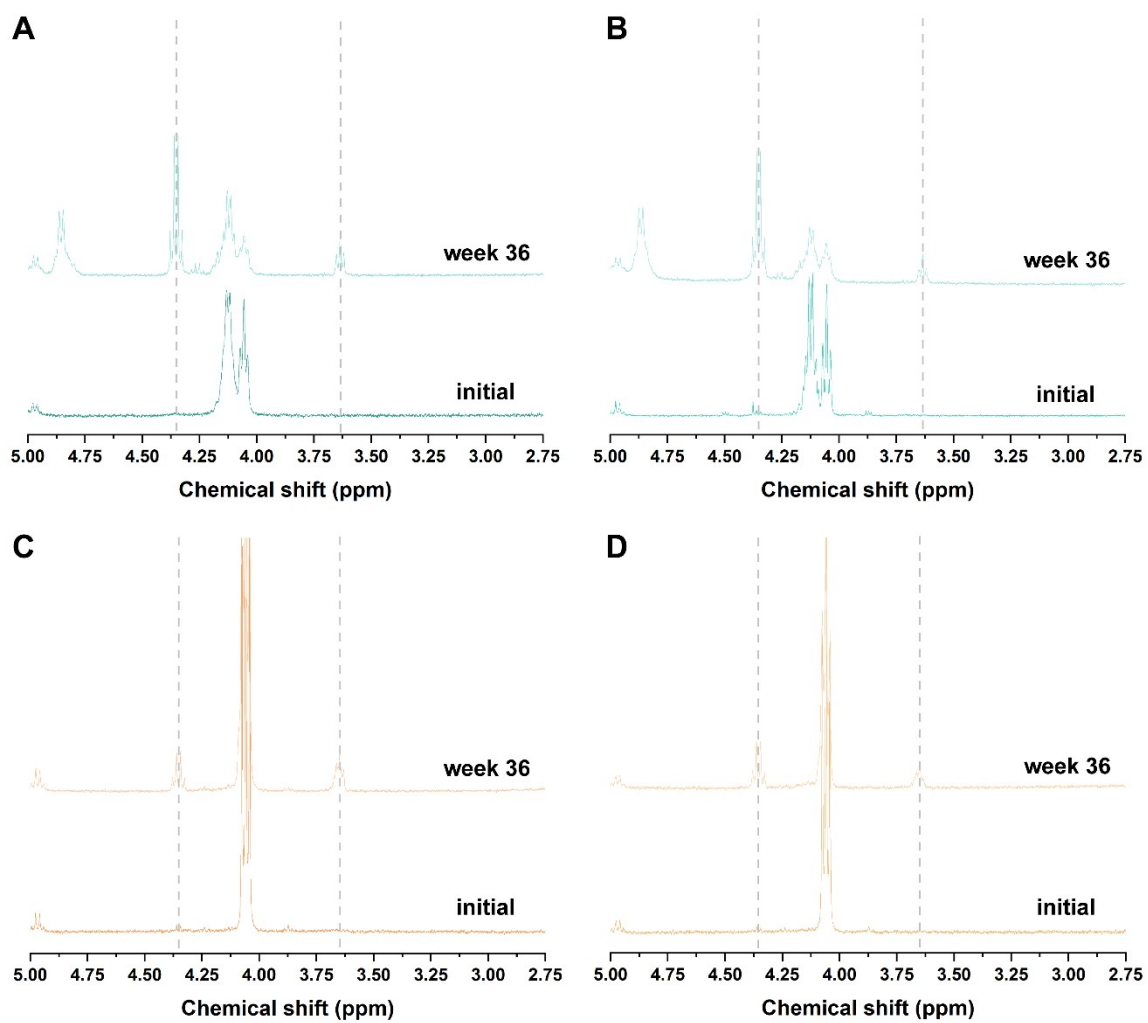

Fig. S4 Enlarged views of characteristic regions in the  $^1\text{H}$  NMR spectra of RP15, RP15 clips, BP15, and BP15 clips after 36 weeks of in vitro degradation compared with the initial state. (A) RP15. (B) RP15 clip. (C) BP15. (D) BP15 clip.

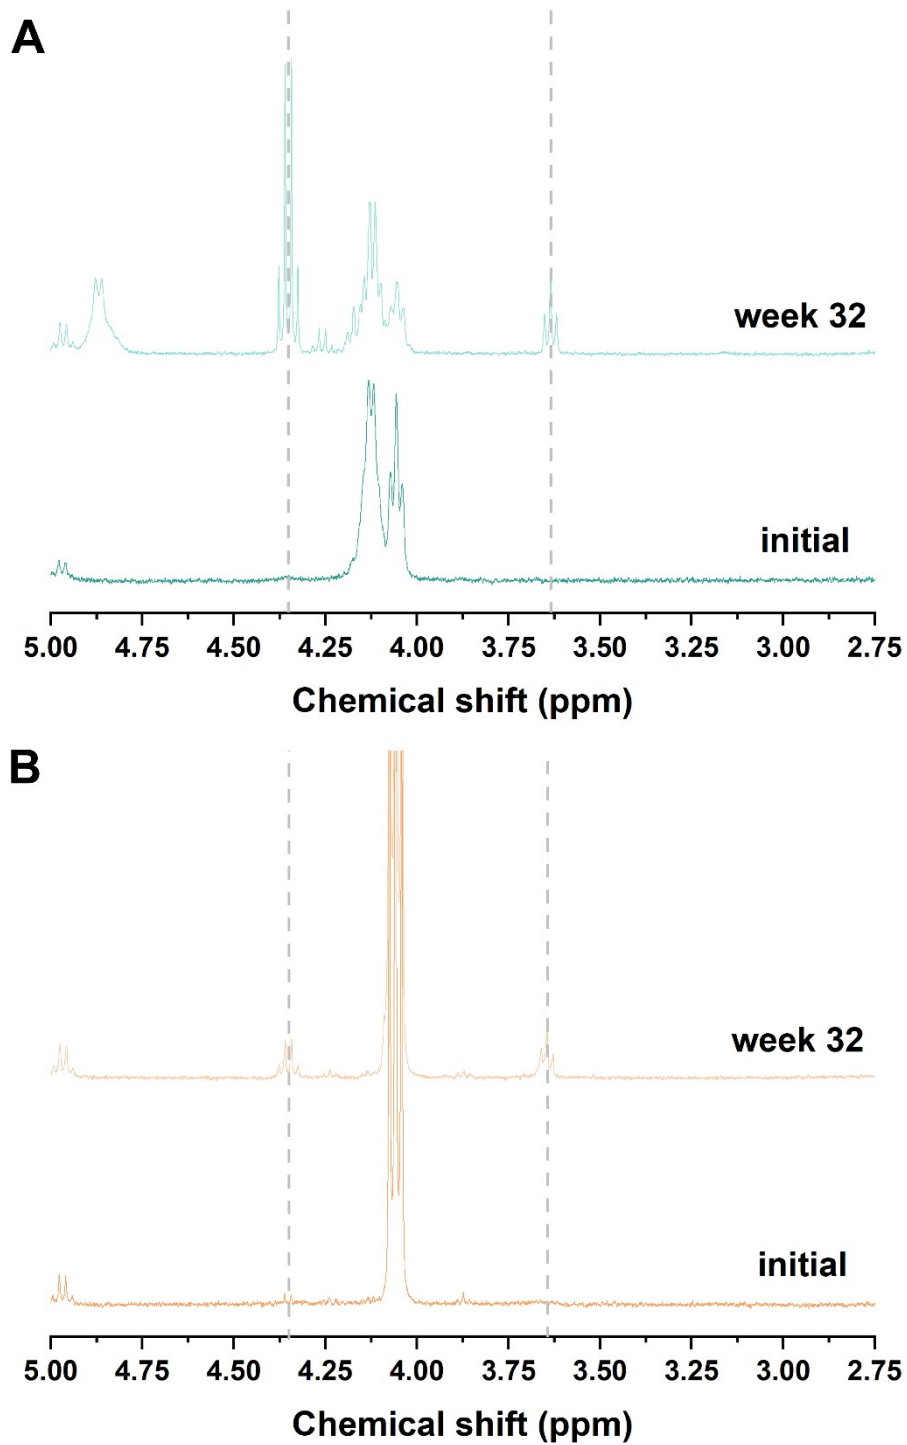

Fig. S5 Enlarged views of characteristic regions in the  $^1\text{H}$  NMR spectra of RP15 and BP15 after 32 weeks of in vivo degradation compared with the initial state. (A) RP15. (B) BP15.

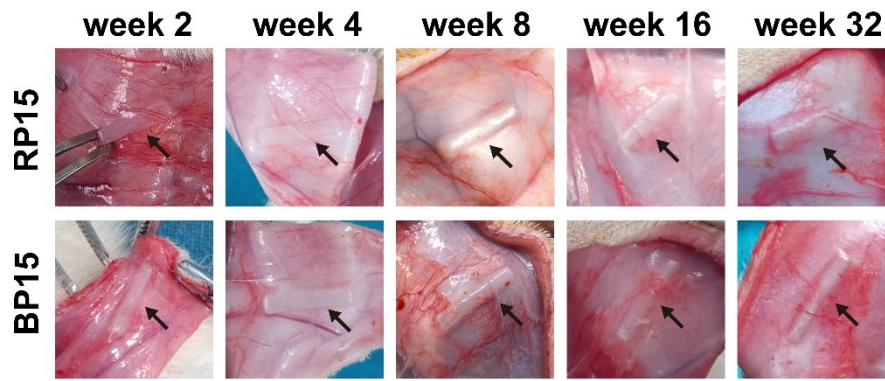

Fig. S6 Macroscopic observation of the subcutaneous implantation sites of RP15 and BP15 at different sampling time points.

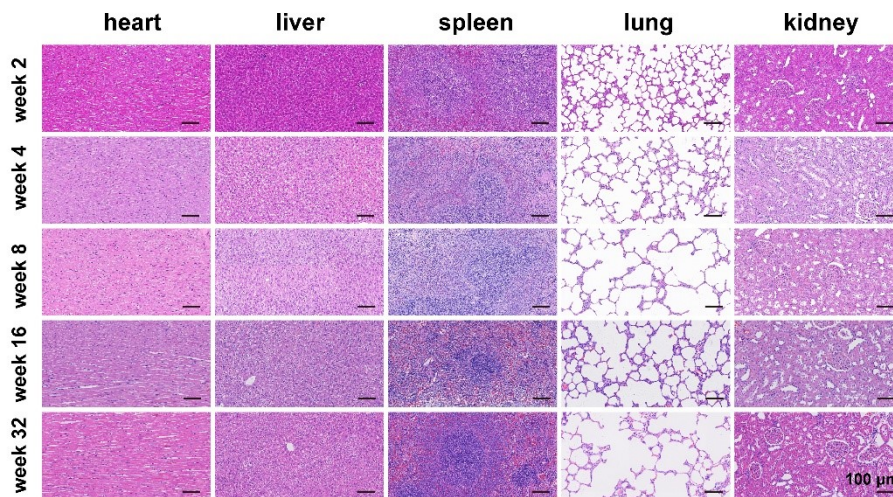

Fig. S7 H&E staining of major organs (heart, liver, spleen, lung, and kidney) of rats at different sampling time points.
